# Supplementary material for: Non-cell autonomous effect of neuronal nicotinamide phosphoribosyl transferase on the function of neuromuscular junctions
Source: PubMed Central journal article supplement — Neural Regen Res. 2020 Aug 24;16(2):302–3. doi: 10.4103/1673-5374.290893 (PMC7896222; doi:10.4103/1673-5374.290893), 2020-08-24
Supplement: NRR-16-302_Suppl1.pdf [file NRR-16-302_Suppl1.pdf]

## OPEN PEER REVIEW REPORT 1

**Name of journal:** Neural Regeneration Research

**Manuscript NO:** NRR-D-20-00263

**Title:** Non-cell autonomous effect of neuronal NAMPT on the function of neuromuscular junctions (NMJs)

**Reviewer's Name:** Xusheng Huang

**Reviewer's country:** China

**Date sent for review:** 2020-4-8

### COMMENTS TO AUTHORS

P2L1 "uaing" might be "using" ?

P2L16 "Long term NMN administration prevented gene expression changes in skeletal muscle .....", change "gene expression changes" to be " age-associated gene expression changes"?

P2L21 "NMN supplementation was able to improve mitochondrial function in aged knockout mice (Mills et al. 2016). ", It might be better to express "aged knockout mice" in more detail?

P3L10-11 These nerves also respond poorly to high frequency stimulation. It might be better to express high frequency stimulation as high frequency stimulation(100 Hz)?

P4L10-11 "Muscle contraction in skeletal muscles from projection neuron knockout mice was impacted, with contractile strength being elevated following loss of NAMPT", It might be better to express "projection neuron knockout mice" as "projection neuron 'Thy1-Nampt -/- conditional' or ' NAMPT' knockout mice" ?

P4P5 Change "Nampt" to be "NAMPT" ?

P6L2 "also plays an important in " change to be "also plays an important role in " ?
